# Supplementary material for: Profiling Transcriptional Regulation and Functional Roles of Schistosoma mansoni c-Jun N-Terminal Kinase
Source: PubMed Central journal article supplement (PMC6813216; doi:10.3389/fgene.2019.01036), 2019-10-18
Supplement: Presentation_1.pdf [file Presentation_1.pdf]

1 *Supplementary Material*

2  
3 **Profiling transcriptional regulation and functional roles of**  
4 ***Schistosoma mansoni* c-Jun N-terminal kinase**

5  
6 Sandra Grossi Gava, Naiara Clemente Tavares, Franco Harald Falcone, Guilherme  
7 Oliveira, Marina Moraes Mourão\*

8  
9 \* Correspondence:

10 Marina Moraes Mourão

11 E-mail: [marina.mourao@fiocruz.br](mailto:marina.mourao@fiocruz.br)

12  
13  
14 **Supplementary Figure Captions**

15  
16 **Supplementary Figure S1. *In vitro* SmJNK knockdown effects in adult schistosome**  
17 **movement.** Male (A) and female (B) movement units of adult worms knocked-down  
18 for SmJNK normalized with untreated (●) or unspecific control (▲). The dotted line  
19 represents normalized movement units in the control (N = 3).

20 **Supplementary Tables**

21

22 **Supplementary Table S1. Primer sequences used in RT-qPCR validation of differentially expressed genes.**

| Gene ID    | Gene name                                                      | Forward                   | Reverse                   | Concentration (nM) | Slope  | R <sup>2</sup> | Efficiency (%) |
|------------|----------------------------------------------------------------|---------------------------|---------------------------|--------------------|--------|----------------|----------------|
| Smp_089880 | Putative fad oxidoreductase                                    | TACGGTTTCTCTTCCAACC       | CATGGACCTGCTGCATTAC       | 400                | -3.32  | 0.996          | 100.1          |
| Smp_093230 | Actin-related protein 10, arp10                                | GAAGGCTTGGAAGGATTCTG      | CAACTGCCAACTCTCGGATA      | 200                | -3.27  | 0.999          | 102.2          |
| Smp_153640 | PDEase domain-containing protein                               | CTGGATGGCATGAATTTCTTC     | GATGATGTTGACGACGACGA      | 400                | -3.505 | 0.990          | 92.9           |
| Smp_244480 | putative ataxia telangiectasia mutated (atm)                   | GAAGAAGAGAAATTACAAGAAACGG | GTATCAGTGAATATAGGCAGAATGG | 200                | -3.342 | 0.993          | 99.2           |
| Smp_303970 | Coatomer subunit alpha                                         | TATCACACAGTACCCTCTTCCC    | TCAATGTGGACTGTAGTGTAAGC   | 400                | -3.282 | 0.989          | 101.7          |
| Smp_340860 | Putative 26s proteasome non-ATPase regulatory subunit          | TGGATCATTTGACAGTTGTGC     | TTCCCACCATCATCATCAG       | 400                | -3.447 | 0.994          | 95.0           |
| Smp_009310 | Putative plasminogen activator inhibitor 1 RNA-binding protein | TAGCTCCGACAGAAGCACCT      | ACGACCTCGACCAAACATTC      | 900                | -3.37  | 0.996          | 98.0           |
| Smp_029820 | Putative 60s acidic ribosomal protein P2                       | AGGCTTGACATCTGCTTGC       | CCACAACCTGATTGCTGAAGG     | 1200               | -3.383 | 0.994          | 97.5           |
| Smp_041650 | Putative 40s ribosomal protein S27                             | AACGTTTGGTTCCCTCACC       | TGACATAGAATTCGGTCACATCC   | 800                | -3.389 | 0.995          | 97.3           |
| Smp_053390 | Histone H4                                                     | GCGACGAATAGCAGGCTTAG      | AAAGGTGGGAAAGGTCTTGG      | 400                | -3.474 | 0.993          | 94.0           |
| Smp_103610 | Cathepsin B-like cysteine proteinase                           | ACTTGGTGGGCACGCTATAC      | GGCTGTTACCTCGGATTCAA      | 200                | -3.364 | 0.996          | 98.3           |
| Smp_335990 | Putative ubiquitin                                             | CTGGTAAGCAGCTAGAAGATGG    | GCTCAACTTCCAAAGTGATCG     | 1200               | -3.332 | 0.984          | 99.6           |

23 **Supplementary Table S2. List of statistically significant DEGs from schistosomula exposed to SmJNK dsRNA.** Each table contains log<sub>2</sub>  
 24 Fold Change and padj values obtained by DESeq2 package.  
 25 EXCEL FILE (TableS2.cvs)

26  
 27 **Supplementary Table S3. List of enriched Gene Ontology categories and KEGG Pathways from downregulated genes in SmJNK**  
 28 **knockdown schistosomula.** The analysis is separated into three GO categories (GO Biological Process, GO Molecular Function, and GO  
 29 Cellular Component) and KEGG Pathways (padj < 0.05).

30

| Biological Process                              |            |                  |           |            |                   |
|-------------------------------------------------|------------|------------------|-----------|------------|-------------------|
| term_name                                       | term_id    | adjusted_p_value | term_size | query_size | intersection_size |
| translation                                     | GO:0006412 | 1,56E-26         | 242       | 312        | 51                |
| peptide biosynthetic process                    | GO:0043043 | 2,91E-26         | 245       | 312        | 51                |
| peptide metabolic process                       | GO:0006518 | 1,44E-25         | 253       | 284        | 49                |
| amide biosynthetic process                      | GO:0043604 | 1,74E-25         | 254       | 284        | 49                |
| cellular amide metabolic process                | GO:0043603 | 2,73E-24         | 269       | 284        | 49                |
| organonitrogen compound biosynthetic process    | GO:1901566 | 1,84E-21         | 427       | 284        | 57                |
| cellular nitrogen compound metabolic process    | GO:0034641 | 1,57E-14         | 1153      | 371        | 99                |
| gene expression                                 | GO:0010467 | 3,42E-16         | 863       | 371        | 86                |
| cellular nitrogen compound biosynthetic process | GO:0044271 | 7,24E-15         | 740       | 361        | 75                |
| cellular macromolecule biosynthetic process     | GO:0034645 | 4,75E-14         | 748       | 361        | 74                |
| macromolecule biosynthetic process              | GO:0009059 | 6,85E-14         | 753       | 361        | 74                |
| cellular biosynthetic process                   | GO:0044249 | 2,99E-12         | 920       | 346        | 78                |
| biosynthetic process                            | GO:0009058 | 1,62E-12         | 950       | 319        | 76                |
| cellular process                                | GO:0009987 | 1,92E-12         | 2960      | 341        | 166               |
| organic substance biosynthetic process          | GO:1901576 | 1,99E-12         | 933       | 319        | 75                |
| cellular metabolic process                      | GO:0044237 | 2,07E-12         | 2073      | 371        | 139               |
| protein metabolic process                       | GO:0019538 | 2,42E-10         | 1133      | 284        | 74                |
| biological_process                              | GO:0008150 | 6,03E-11         | 3995      | 371        | 214               |

|                                                                                   |            |                        |      |     |     |
|-----------------------------------------------------------------------------------|------------|------------------------|------|-----|-----|
| primary metabolic process                                                         | GO:0044238 | 9,33E-10               | 2189 | 371 | 137 |
| cellular protein metabolic process                                                | GO:0044267 | 1,14E-11               | 928  | 284 | 68  |
| organonitrogen compound metabolic process                                         | GO:1901564 | 1,8E-11                | 1297 | 284 | 83  |
| nitrogen compound metabolic process                                               | GO:0006807 | 2,29E-09               | 2034 | 341 | 121 |
| organic substance metabolic process                                               | GO:0071704 | 4,9E-09                | 2260 | 371 | 138 |
| cellular macromolecule metabolic process                                          | GO:0044260 | 1,08E-08               | 1466 | 341 | 95  |
| metabolic process                                                                 | GO:0008152 | 1,11E-08               | 2518 | 371 | 151 |
| macromolecule metabolic process                                                   | GO:0043170 | 1,46E-08               | 1871 | 341 | 112 |
| protein folding                                                                   | GO:0006457 | 5,37E-08               | 44   | 366 | 14  |
| ATP hydrolysis coupled cation transmembrane transport                             | GO:0099132 | 0.00002036949264641862 | 24   | 368 | 9   |
| proton transmembrane transport                                                    | GO:1902600 | 0.00005369077541597394 | 34   | 368 | 10  |
| ATP metabolic process                                                             | GO:0046034 | 0.00017004833961436932 | 38   | 368 | 10  |
| purine nucleoside triphosphate biosynthetic process                               | GO:0009145 | 0.003037670897198561   | 18   | 316 | 6   |
| purine nucleoside triphosphate metabolic process                                  | GO:0009144 | 0.003037670897198561   | 18   | 316 | 6   |
| purine ribonucleoside triphosphate biosynthetic process                           | GO:0009206 | 0.003037670897198561   | 18   | 316 | 6   |
| purine ribonucleoside triphosphate metabolic process                              | GO:0009205 | 0.003037670897198561   | 18   | 316 | 6   |
| ATP synthesis coupled proton transport                                            | GO:0015986 | 0.004856734136094929   | 12   | 316 | 5   |
| ATP biosynthetic process                                                          | GO:0006754 | 0.004856734136094929   | 12   | 316 | 5   |
| energy coupled proton transport, down electrochemical gradient                    | GO:0015985 | 0.004856734136094929   | 12   | 316 | 5   |
| nucleoside triphosphate biosynthetic process                                      | GO:0009142 | 0.006017155969374157   | 20   | 316 | 6   |
| ribonucleoside triphosphate metabolic process                                     | GO:0009199 | 0.006017155969374157   | 20   | 316 | 6   |
| ribonucleoside triphosphate biosynthetic process                                  | GO:0009201 | 0.006017155969374157   | 20   | 316 | 6   |
| regulation of cellular catabolic process                                          | GO:0031329 | 0.0060793489282895165  | 12   | 331 | 5   |
| purine ribonucleotide metabolic process                                           | GO:0009150 | 0.008363094556938505   | 53   | 316 | 9   |
| positive regulation of proteolysis                                                | GO:0045862 | 0.00889867157110456    | 7    | 327 | 4   |
| positive regulation of protein catabolic process                                  | GO:0045732 | 0.00889867157110456    | 7    | 327 | 4   |
| positive regulation of proteolysis involved in cellular protein catabolic process | GO:1903052 | 0.00889867157110456    | 7    | 327 | 4   |

|                                                                                 |            |                      |     |     |    |
|---------------------------------------------------------------------------------|------------|----------------------|-----|-----|----|
| positive regulation of catabolic process                                        | GO:0009896 | 0.00889867157110456  | 7   | 327 | 4  |
| positive regulation of cellular protein catabolic process                       | GO:1903364 | 0.00889867157110456  | 7   | 327 | 4  |
| positive regulation of proteasomal protein catabolic process                    | GO:1901800 | 0.00889867157110456  | 7   | 327 | 4  |
| positive regulation of cellular catabolic process                               | GO:0031331 | 0.00889867157110456  | 7   | 327 | 4  |
| nucleoside triphosphate metabolic process                                       | GO:0009141 | 0.010989660932852382 | 22  | 316 | 6  |
| purine nucleotide metabolic process                                             | GO:0006163 | 0.01317340598199164  | 56  | 316 | 9  |
| ribose phosphate metabolic process                                              | GO:0019693 | 0.01317340598199164  | 56  | 316 | 9  |
| ribonucleotide metabolic process                                                | GO:0009259 | 0.01317340598199164  | 56  | 316 | 9  |
| purine-containing compound metabolic process                                    | GO:0072521 | 0.015914400720549757 | 63  | 357 | 10 |
| regulation of proteasomal protein catabolic process                             | GO:0061136 | 0.01734643067712882  | 8   | 327 | 4  |
| regulation of proteolysis involved in cellular protein catabolic process        | GO:1903050 | 0.01734643067712882  | 8   | 327 | 4  |
| regulation of cellular protein catabolic process                                | GO:1903362 | 0.01734643067712882  | 8   | 327 | 4  |
| regulation of catabolic process                                                 | GO:0009894 | 0.021262053480788943 | 15  | 331 | 5  |
| RNA splicing                                                                    | GO:0008380 | 0.023264121690808364 | 59  | 322 | 9  |
| protein import into nucleus                                                     | GO:0006606 | 0.02525493684655285  | 8   | 360 | 4  |
| protein localization to nucleus                                                 | GO:0034504 | 0.02525493684655285  | 8   | 360 | 4  |
| proteolysis involved in cellular protein catabolic process                      | GO:0051603 | 0.027637528021193663 | 73  | 327 | 10 |
| cellular protein catabolic process                                              | GO:0044257 | 0.03483520942918839  | 75  | 327 | 10 |
| ATP hydrolysis coupled proton transport                                         | GO:0015991 | 0.03512230510764226  | 15  | 368 | 5  |
| ATP hydrolysis coupled ion transmembrane transport                              | GO:0099131 | 0.03512230510764226  | 15  | 368 | 5  |
| ATP hydrolysis coupled transmembrane transport                                  | GO:0090662 | 0.03512230510764226  | 15  | 368 | 5  |
| energy coupled proton transmembrane transport, against electrochemical gradient | GO:0015988 | 0.03512230510764226  | 15  | 368 | 5  |
| organic substance catabolic process                                             | GO:1901575 | 0.035411496770635834 | 154 | 367 | 16 |
| translational initiation                                                        | GO:0006413 | 0.041303296366220654 | 39  | 312 | 7  |
| inorganic cation transmembrane transport                                        | GO:0098662 | 0.044142864667227576 | 85  | 240 | 9  |
| import into nucleus                                                             | GO:0051170 | 0.044191369106860286 | 9   | 360 | 4  |

#### Cellular Component

| term_name                                     | term_id    | adjusted_p_value        | term_size | query_size | intersection_size |
|-----------------------------------------------|------------|-------------------------|-----------|------------|-------------------|
| cytoplasm                                     | GO:0005737 | 7,96E-34                | 716       | 327        | 96                |
| ribosome                                      | GO:0005840 | 1,09E-30                | 143       | 311        | 44                |
| intracellular                                 | GO:0005622 | 3,88E-31                | 1535      | 367        | 148               |
| intracellular part                            | GO:0044424 | 2,46E-30                | 1485      | 367        | 144               |
| ribonucleoprotein complex                     | GO:1990904 | 7,35E-29                | 206       | 322        | 50                |
| cell                                          | GO:0005623 | 3,29E-28                | 1725      | 367        | 153               |
| cell part                                     | GO:0044464 | 7,7E-27                 | 1674      | 367        | 148               |
| protein-containing complex                    | GO:0032991 | 8,53E-27                | 880       | 372        | 104               |
| cytoplasmic part                              | GO:0044444 | 1,26E-23                | 528       | 315        | 69                |
| intracellular non-membrane-bounded organelle  | GO:0043232 | 1,65E-21                | 455       | 301        | 60                |
| non-membrane-bounded organelle                | GO:0043228 | 1,65E-21                | 455       | 301        | 60                |
| intracellular organelle                       | GO:0043229 | 3,18E-20                | 1211      | 364        | 111               |
| organelle                                     | GO:0043226 | 1,06E-20                | 1229      | 364        | 111               |
| cellular_component                            | GO:0005575 | 3,62E-17                | 3007      | 368        | 189               |
| ribosomal subunit                             | GO:0044391 | 9,87E-10                | 31        | 148        | 10                |
| intracellular organelle part                  | GO:0044446 | 5,19E-09                | 691       | 361        | 60                |
| small ribosomal subunit                       | GO:0015935 | 7,48E-09                | 15        | 54         | 6                 |
| organelle part                                | GO:0044422 | 9,89E-09                | 702       | 361        | 60                |
| proton-transporting two-sector ATPase complex | GO:0016469 | 0.000033340414340879555 | 28        | 368        | 9                 |
| intracellular membrane-bounded organelle      | GO:0043231 | 0.0003254368151697163   | 843       | 372        | 57                |
| membrane-bounded organelle                    | GO:0043227 | 0.00042539893327894784  | 871       | 372        | 58                |
| collagen trimer                               | GO:0005581 | 0.0008560587184345816   | 6         | 290        | 4                 |
| large ribosomal subunit                       | GO:0015934 | 0.000998150601320439    | 16        | 358        | 6                 |
| proteasome complex                            | GO:0000502 | 0.0010641972132517067   | 35        | 327        | 8                 |
| endopeptidase complex                         | GO:1905369 | 0.0010641972132517067   | 35        | 327        | 8                 |
| proton-transporting ATP synthase complex      | GO:0045259 | 0.0017115059409485824   | 12        | 316        | 5                 |
| organelle membrane                            | GO:0031090 | 0.0022122525506626275   | 181       | 240        | 15                |

|                                                                           |            |                       |     |     |    |
|---------------------------------------------------------------------------|------------|-----------------------|-----|-----|----|
| proton-transporting two-sector ATPase complex, catalytic domain           | GO:0033178 | 0.0035717447354012195 | 12  | 368 | 5  |
| mitochondrial envelope                                                    | GO:0005740 | 0.003847683226486142  | 65  | 203 | 8  |
| peptidase complex                                                         | GO:1905368 | 0.005239484569349109  | 43  | 327 | 8  |
| membrane protein complex                                                  | GO:0098796 | 0.008703524495472636  | 149 | 368 | 16 |
| mitochondrial membrane                                                    | GO:0031966 | 0.00896532966217273   | 57  | 194 | 7  |
| nucleosome                                                                | GO:0000786 | 0.012808504060448294  | 24  | 356 | 6  |
| proton-transporting two-sector ATPase complex, proton-transporting domain | GO:0033177 | 0.016857577457431303  | 13  | 240 | 4  |
| DNA packaging complex                                                     | GO:0044815 | 0.020648794787145514  | 26  | 356 | 6  |
| protein-DNA complex                                                       | GO:0032993 | 0.020648794787145514  | 26  | 356 | 6  |
| envelope                                                                  | GO:0031975 | 0.02213081644347884   | 83  | 203 | 8  |
| organelle envelope                                                        | GO:0031967 | 0.02213081644347884   | 83  | 203 | 8  |
| proton-transporting ATP synthase complex, catalytic core F(1)             | GO:0045261 | 0.026153877468782682  | 5   | 316 | 3  |
| proteasome core complex                                                   | GO:0005839 | 0.03677935880748339   | 15  | 251 | 4  |
| mitochondrial part                                                        | GO:0044429 | 0.03861625090962635   | 90  | 203 | 8  |
| bounding membrane of organelle                                            | GO:0098588 | 0.04261873163212783   | 85  | 275 | 9  |

| Molecular Function                          |            |                         |           |            |                   |
|---------------------------------------------|------------|-------------------------|-----------|------------|-------------------|
| term_name                                   | term_id    | adjusted_p_value        | term_size | query_size | intersection_size |
| structural molecule activity                | GO:0005198 | 6,98E-34                | 185       | 152        | 40                |
| structural constituent of ribosome          | GO:0003735 | 2,02E-28                | 128       | 301        | 40                |
| molecular_function                          | GO:0003674 | 3,6E-18                 | 5283      | 373        | 279               |
| heterocyclic compound binding               | GO:1901363 | 9,79E-18                | 1845      | 370        | 140               |
| RNA binding                                 | GO:0003723 | 1,62E-18                | 352       | 370        | 55                |
| organic cyclic compound binding             | GO:0097159 | 1,03E-17                | 1846      | 370        | 140               |
| nucleic acid binding                        | GO:0003676 | 1,46E-13                | 1054      | 370        | 91                |
| binding                                     | GO:0005488 | 4,62E-12                | 3620      | 373        | 203               |
| extracellular matrix structural constituent | GO:0005201 | 0.000006038829067217214 | 11        | 102        | 5                 |
| unfolded protein binding                    | GO:0051082 | 0.00005150980774374434  | 28        | 366        | 9                 |

|                                                                                    |            |                        |      |     |    |
|------------------------------------------------------------------------------------|------------|------------------------|------|-----|----|
| proton transmembrane transporter activity                                          | GO:0015078 | 0.00005164345770840948 | 41   | 316 | 10 |
| ion binding                                                                        | GO:0043167 | 0.00008862333838870891 | 1509 | 369 | 90 |
| purine ribonucleotide binding                                                      | GO:0032555 | 0.00038870566181245704 | 803  | 368 | 55 |
| purine nucleotide binding                                                          | GO:0017076 | 0.0004355852488050613  | 806  | 368 | 55 |
| small molecule binding                                                             | GO:0036094 | 0.00045698611524626543 | 911  | 368 | 60 |
| ribonucleotide binding                                                             | GO:0032553 | 0.0004697202767809331  | 808  | 368 | 55 |
| nucleoside phosphate binding                                                       | GO:1901265 | 0.0005424103025568984  | 874  | 368 | 58 |
| nucleotide binding                                                                 | GO:0000166 | 0.0005424103025568984  | 874  | 368 | 58 |
| purine ribonucleoside triphosphate binding                                         | GO:0035639 | 0.0005568939578934083  | 792  | 368 | 54 |
| ATPase activity, coupled                                                           | GO:0042623 | 0.0006040045842672542  | 72   | 340 | 12 |
| anion binding                                                                      | GO:0043168 | 0.00064928849977488    | 900  | 368 | 59 |
| carbohydrate derivative binding                                                    | GO:0097367 | 0.0007329760323595684  | 820  | 368 | 55 |
| nucleoside-triphosphatase activity                                                 | GO:0017111 | 0.0023163089567947285  | 330  | 340 | 27 |
| pyrophosphatase activity                                                           | GO:0016462 | 0.0035569348186957144  | 338  | 340 | 27 |
| hydrolase activity, acting on acid anhydrides, in phosphorus-containing anhydrides | GO:0016818 | 0.0043804768885977894  | 342  | 340 | 27 |
| proton-transporting ATP synthase activity, rotational mechanism                    | GO:0046933 | 0.0044334894191827     | 7    | 316 | 4  |
| structural constituent of cytoskeleton                                             | GO:0005200 | 0.004633497481722036   | 16   | 121 | 4  |
| proteasome-activating ATPase activity                                              | GO:0036402 | 0.005073570955465585   | 7    | 327 | 4  |
| hydrolase activity, acting on acid anhydrides                                      | GO:0016817 | 0.005107551169497762   | 345  | 340 | 27 |
| L-lactate dehydrogenase activity                                                   | GO:0004459 | 0.010793763431696754   | 2    | 87  | 2  |
| lactate dehydrogenase activity                                                     | GO:0004457 | 0.010793763431696754   | 2    | 87  | 2  |
| translation initiation factor activity                                             | GO:0003743 | 0.014447137370812808   | 47   | 321 | 8  |
| ATPase activity                                                                    | GO:0016887 | 0.014647710830029931   | 98   | 340 | 12 |
| ATPase coupled ion transmembrane transporter activity                              | GO:0042625 | 0.01902985354987977    | 17   | 316 | 5  |
| active ion transmembrane transporter activity                                      | GO:0022853 | 0.01902985354987977    | 17   | 316 | 5  |
| cation-transporting ATPase activity                                                | GO:0019829 | 0.01902985354987977    | 17   | 316 | 5  |
| drug binding                                                                       | GO:0008144 | 0.02569201274685189    | 672  | 368 | 43 |

|                                                                                  |            |                      |     |     |    |
|----------------------------------------------------------------------------------|------------|----------------------|-----|-----|----|
| adenyl ribonucleotide binding                                                    | GO:0032559 | 0.02657446646458657  | 652 | 368 | 42 |
| adenyl nucleotide binding                                                        | GO:0030554 | 0.02747297309130325  | 653 | 368 | 42 |
| peptidyl-prolyl cis-trans isomerase activity                                     | GO:0003755 | 0.030141544695469886 | 19  | 308 | 5  |
| cis-trans isomerase activity                                                     | GO:0016859 | 0.030141544695469886 | 19  | 308 | 5  |
| ATP binding                                                                      | GO:0005524 | 0.036997986471330804 | 641 | 368 | 41 |
| ATPase activity, coupled to transmembrane movement of ions, rotational mechanism | GO:0044769 | 0.03786242193559343  | 11  | 316 | 4  |

| <b>KEGG Pathway</b>       |                |                         |                  |                   |                          |
|---------------------------|----------------|-------------------------|------------------|-------------------|--------------------------|
| <b>term_name</b>          | <b>term_id</b> | <b>adjusted_p_value</b> | <b>term_size</b> | <b>query_size</b> | <b>intersection_size</b> |
| Ribosome                  | KEGG:03010     | 1,26E-26                | 83               | 152               | 26                       |
| Phagosome                 | KEGG:04145     | 0.000040246025285053825 | 41               | 368               | 11                       |
| Spliceosome               | KEGG:03040     | 0.00011533198327651202  | 78               | 370               | 13                       |
| Oxidative phosphorylation | KEGG:00190     | 0.002152115462101306    | 51               | 368               | 9                        |
| ECM-receptor interaction  | KEGG:04512     | 0.009036501095036616    | 8                | 187               | 3                        |
| Pyruvate metabolism       | KEGG:00620     | 0.04343022668549986     | 18               | 295               | 4                        |

31 **Supplementary Table S4. List of enriched RNAi phenotypes in *C. elegans* orthologs**  
 32 **from downregulated genes in SmJNK knockdown schistosomula.**  
 33

| Term                                                                 | Overlap  |
|----------------------------------------------------------------------|----------|
| sterile_WBPhenotype:0000688                                          | 137/1370 |
| embryonic lethal_WBPhenotype:0000050                                 | 185/3015 |
| maternal sterile_WBPhenotype:0000689                                 | 119/1002 |
| larval arrest_WBPhenotype:0000059                                    | 141/1606 |
| transgene subcellular localization variant_WBPhenotype:0000679       | 124/1182 |
| slow growth_WBPhenotype:0000031                                      | 130/1858 |
| avoids bacterial lawn_WBPhenotype:0000402                            | 76/484   |
| germ cell compartment expansion variant_WBPhenotype:0001980          | 70/437   |
| RAB-11 recycling endosome morphology variant_WBPhenotype:0002094     | 61/353   |
| pachytene region organization variant_WBPhenotype:0001951            | 55/274   |
| lysosome-related organelle morphology variant_WBPhenotype:0002095    | 58/337   |
| rachis narrow_WBPhenotype:0001941                                    | 55/292   |
| RAB-11 recycling endosome localization variant_WBPhenotype:0002107   | 51/246   |
| chromosome condensation variant_WBPhenotype:0001361                  | 51/247   |
| pleiotropic defects severe early emb_WBPhenotype:0000270             | 39/122   |
| transgene expression increased_WBPhenotype:0001236                   | 85/1038  |
| gonad vesiculated_WBPhenotype:0001979                                | 45/213   |
| nuclei small_WBPhenotype:0001792                                     | 41/172   |
| sister chromatid segregation defective early emb_WBPhenotype:0000772 | 34/103   |
| protein aggregation variant_WBPhenotype:0001405                      | 59/503   |
| oocyte number decreased_WBPhenotype:0001944                          | 50/333   |
| oocyte morphology variant_WBPhenotype:0001260                        | 48/325   |
| larval lethal_WBPhenotype:0000054                                    | 68/770   |
| locomotion variant_WBPhenotype:0000643                               | 87/1347  |
| apoptosis reduced_WBPhenotype:0000182                                | 41/220   |
| sick_WBPhenotype:0000032                                             | 62/651   |
| cytoplasmic processing body variant_WBPhenotype:0001794              | 44/279   |
| diplotene region organization variant_WBPhenotype:0001950            | 36/201   |
| oocytes small_WBPhenotype:0001945                                    | 29/127   |
| cell membrane organization biogenesis variant_WBPhenotype:0001982    | 42/344   |
| diplotene absent during oogenesis_WBPhenotype:0001954                | 28/119   |
| embryonic arrest_WBPhenotype:0000867                                 | 31/160   |
| rachis morphology variant_WBPhenotype:0001940                        | 39/300   |
| cell corpse degradation variant_WBPhenotype:0010004                  | 20/44    |
| body elongation defective_WBPhenotype:0000242                        | 20/48    |
| accumulated cell corpses_WBPhenotype:0000241                         | 22/65    |
| pattern of transgene expression variant_WBPhenotype:0000961          | 62/929   |
| gonad small_WBPhenotype:0001957                                      | 24/88    |
| pharyngeal development variant_WBPhenotype:0000707                   | 20/51    |
| transgene expression reduced_WBPhenotype:0001278                     | 55/760   |
| receptor mediated endocytosis defective_WBPhenotype:0001425          | 54/737   |
| anaphase bridging_WBPhenotype:0001875                                | 21/70    |

|                                                                                      |         |
|--------------------------------------------------------------------------------------|---------|
| extended life span_WBPhenotype:0000061                                               | 47/585  |
| no induction of antimicrobial peptide expression after infection_WBPhenotype:0002460 | 36/340  |
| germ cell compartment morphology variant_WBPhenotype:0001969                         | 34/304  |
| lethal_WBPhenotype:0000062                                                           | 45/579  |
| protruding vulva_WBPhenotype:0000697                                                 | 51/763  |
| pachytene progression during oogenesis variant_WBPhenotype:0001946                   | 20/82   |
| chromosome segregation variant_WBPhenotype:0000773                                   | 23/123  |
| apoptosis fails to occur_WBPhenotype:0000184                                         | 20/83   |
| no oocytes_WBPhenotype:0000291                                                       | 28/213  |
| intestinal degeneration_WBPhenotype:0002428                                          | 14/33   |
| rachis absent_WBPhenotype:0001942                                                    | 19/87   |
| growth variant_WBPhenotype:0000030                                                   | 28/244  |
| germ cell compartment expansion absent_WBPhenotype:0001981                           | 17/65   |
| pathogen resistance increased_WBPhenotype:0001014                                    | 15/46   |
| early larval arrest_WBPhenotype:0000055                                              | 24/188  |
| nuclear appearance variant_WBPhenotype:0001028                                       | 25/225  |
| oocyte septum formation variant_WBPhenotype:0001810                                  | 22/171  |
| germ cell compartment anucleate_WBPhenotype:0001971                                  | 19/124  |
| oocytes lack nucleus_WBPhenotype:0001956                                             | 18/121  |
| germline nuclear positioning variant_WBPhenotype:0001952                             | 25/274  |
| molt defect_WBPhenotype:0000638                                                      | 24/257  |
| lima bean arrest_WBPhenotype:0000361                                                 | 45/566  |
| reduced brood size_WBPhenotype:0000154                                               | 47/1003 |
| cell secretion variant_WBPhenotype:0000258                                           | 15/90   |
| accumulated germline cell corpses_WBPhenotype:0001180                                | 22/245  |
| germ cell compartment size variant_WBPhenotype:0001973                               | 19/176  |
| nonsense mRNA accumulation_WBPhenotype:0000508                                       | 15/111  |
| mRNA surveillance defective_WBPhenotype:0001538                                      | 15/112  |
| organism morphology variant_WBPhenotype:0000535                                      | 27/420  |
| body wall muscle myosin organization defective_WBPhenotype:0001569                   | 16/155  |
| apoptosis variant_WBPhenotype:0000730                                                | 17/182  |
| shortened life span_WBPhenotype:0001171                                              | 26/444  |
| gonad development variant_WBPhenotype:0000691                                        | 20/273  |
| slow embryonic development_WBPhenotype:0000042                                       | 32/112  |
| gonad morphology variant_WBPhenotype:0001355                                         | 16/182  |
| multiple nuclei oocyte_WBPhenotype:0001955                                           | 28/065  |
| excess intestinal cells_WBPhenotype:0001636                                          | 12/101  |
| development variant_WBPhenotype:0000518                                              | 12/997  |
| passage through meiosis defective early emb_WBPhenotype:0000776                      | 24/016  |
| cell proliferation increased_WBPhenotype:0000172                                     | 12/103  |
| pathogen susceptibility increased_WBPhenotype:0001013                                | 13/134  |
| germ cell compartment multinucleate_WBPhenotype:0001972                              | 15/184  |
| germ cell partition morphology variant_WBPhenotype:0001977                           | 34/639  |
| meiotic progression during oogenesis variant_WBPhenotype:0000313                     | 47/300  |
| protein expression reduced_WBPhenotype:0000120                                       | 16/223  |
| sterile progeny_WBPhenotype:0001037                                                  | 31/763  |

|                                                                     |        |
|---------------------------------------------------------------------|--------|
| foraging behavior variant_WBPhenotype:0000662                       | 13/149 |
| embryonic morphology variant_WBPhenotype:0001136                    | 13332  |
| oocytes disorganized_WBPhenotype:0001925                            | 26177  |
| nuclei enlarged_WBPhenotype:0001567                                 | 34608  |
| dauer lifespan extended_WBPhenotype:0002277                         | 28/694 |
| fat content reduced_WBPhenotype:0001183                             | 20/423 |
| paralyzed_WBPhenotype:0000644                                       | 11/135 |
| embryonic lethal late emb_WBPhenotype:0001020                       | 27242  |
| variable cell division timing_WBPhenotype:0002390                   | 27242  |
| mitochondria alignment variant_WBPhenotype:0001577                  | 10/125 |
| diakinesis progression during oogenesis variant_WBPhenotype:0001948 | 28338  |
| germ cell development variant_WBPhenotype:0000812                   | 11/154 |
| general pace of development defective early emb_WBPhenotype:0000126 | 21367  |
| transgene expression variant_WBPhenotype:0000306                    | 12/190 |
| dead eggs laid_WBPhenotype:0000274                                  | 30529  |
| nuclear fallout_WBPhenotype:0001953                                 | 22463  |
| germ cell compartment small_WBPhenotype:0001974                     | 23924  |
| germ cell partition absent_WBPhenotype:0001978                      | 42095  |
| increased levels of reactive oxygen species_WBPhenotype:0002238     | 43619  |
| diplotene progression during oogenesis variant_WBPhenotype:0001947  | 19146  |
| ATP levels reduced_WBPhenotype:0001575                              | 43191  |
| germ cell morphology variant_WBPhenotype:0000900                    | 28672  |
| patchy coloration_WBPhenotype:0001029                               | 8/106  |
| diakinesis region organization variant_WBPhenotype:0001949          | 13271  |
| small_WBPhenotype:0000229                                           | 15/344 |
| thin_WBPhenotype:0000164                                            | 11/207 |
| unfertilized oocytes laid_WBPhenotype:0000357                       | 43711  |
| L1 arrest_WBPhenotype:0000081                                       | 22433  |
| motor neuron morphology variant_WBPhenotype:0001331                 | 45383  |
| synapse density variant_WBPhenotype:0002001                         | 45383  |
| exploded through vulva_WBPhenotype:0000038                          | 15/372 |
| mRNA levels increased_WBPhenotype:0000136                           | 33786  |
| life span variant_WBPhenotype:0000039                               | 10/187 |
| cell membrane morphology variant_WBPhenotype:0001399                | 43802  |
| rachis wide_WBPhenotype:0001943                                     | 26451  |
| embryo osmotic integrity defective early emb_WBPhenotype:0000365    | 8/130  |
| organism development variant_WBPhenotype:0000531                    | 18/527 |
| peptide uptake by intestinal cell decreased_WBPhenotype:0002082     | 18749  |
| adult lethal_WBPhenotype:0000060                                    | 28642  |
| protein expression absent_WBPhenotype:0001410                       | 41699  |
| cell division precocious_WBPhenotype:0001495                        | 41699  |
| organism heat response variant_WBPhenotype:0001273                  | 42430  |
| late larval arrest_WBPhenotype:0000056                              | 31199  |
| clear_WBPhenotype:0001010                                           | 10/221 |
| protein transport variant_WBPhenotype:0001864                       | 43525  |
| ectopic expression antibody_WBPhenotype:0001404                     | 43525  |

|                                                              |       |
|--------------------------------------------------------------|-------|
| protein subcellular localization variant_WBPhenotype:0000436 | 9/197 |
| male gonad development variant_WBPhenotype:0001675           | 7/128 |
| embryonic terminal arrest variable emb_WBPhenotype:0000051   | 43891 |
| mitochondrial content increased_WBPhenotype:0002267          | 43618 |

---

34
